# Supplementary material for: scFASTCORMICS: A Contextualization Algorithm to Reconstruct Metabolic Multi-Cell Population Models from Single-Cell RNAseq Data
Source: MDPI journal article supplement (doi:10.3390/metabo12121211), 2022-12-02
Supplement: s1 [file s1]

# scFASTCORMICS: A contextualization algorithm to reconstruct metabolic multi-cell population models from single-cell RNAseq data- Supplementary File

Maria Pires Pacheco, Jimmy Ji, Tessy Prohaska, María Moscardó García and Thomas Sauter

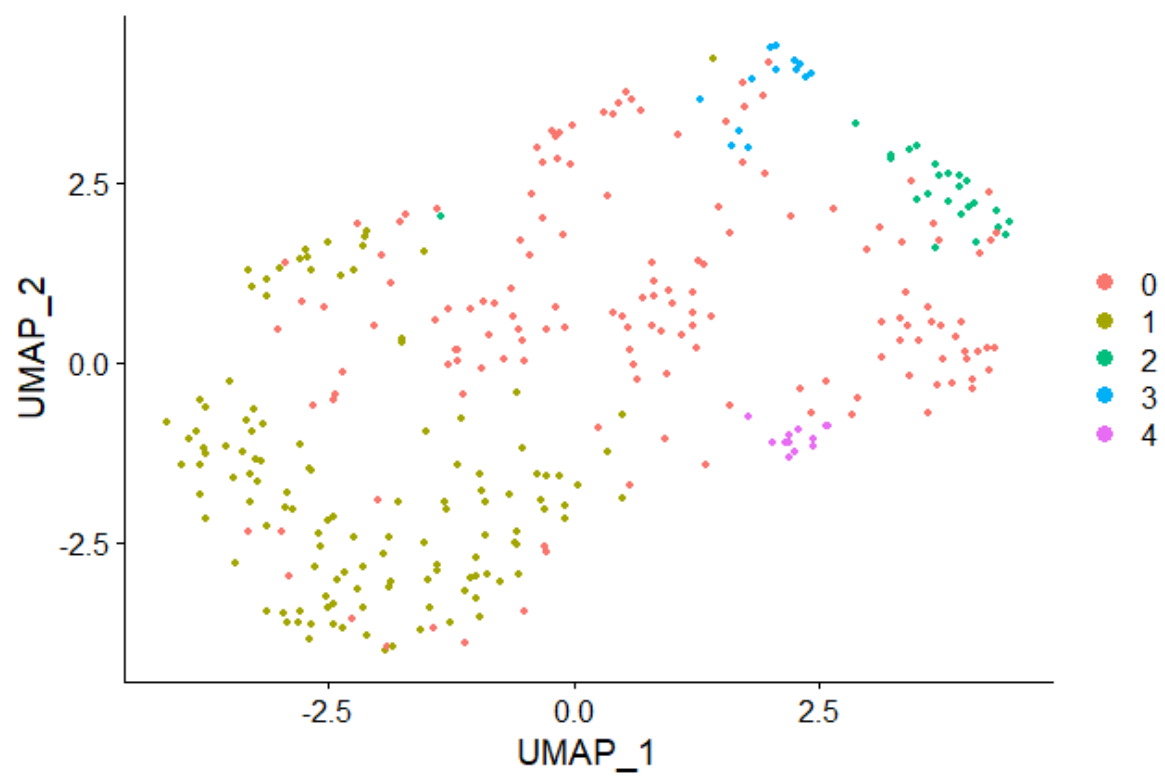

Figure S1: Quality Control: UMAP plot of the single-cell RNAseq data of dataset1 obtained after running the Seurat pipeline

Table S1: **Datasets used for the parameter optimisation.** The accession numbers of the single-cell RNAseq and the matching bulk RNAseq data as well as the tissue and cell type and the number of samples/cells are given for the 20 datasets.

| Tissue/Cell type                                                | Single-cell RNAseq data<br>accession number | Number<br>of cells | Bulk RNAseq<br>accession number                             | Number<br>of samples |
|-----------------------------------------------------------------|---------------------------------------------|--------------------|-------------------------------------------------------------|----------------------|
| Colorectal cancer (CRC)                                         |                                             |                    |                                                             |                      |
| CRC tumour all cells                                            | GSE81861                                    | 279                | Lee <i>et al</i> (2020)                                     | 26                   |
| CRC normal mucosa                                               | GSE81861                                    | 202                | Healthy colon from                                          | 376                  |
| All cells                                                       |                                             |                    | GTEX                                                        |                      |
| Human islet single-cells (HISC)                                 |                                             |                    |                                                             |                      |
| Pancreas donor 1                                                | GSE114297                                   | 1551               | Pancreatic<br>islet cell<br>from EBI<br>Expression<br>Atlas | 121                  |
| Pancreas donor 2                                                |                                             | 918                |                                                             |                      |
| Pancreas donor 3                                                |                                             | 1954               |                                                             |                      |
| Pancreas donor 4                                                |                                             | 1503               |                                                             |                      |
| Pancreas donor 5                                                |                                             | 1052               |                                                             |                      |
| Pancreas donor 6                                                |                                             | 404                |                                                             |                      |
| Pancreas donor 7                                                |                                             | 1860               |                                                             |                      |
| Pancreas donor 8                                                |                                             | 1557               |                                                             |                      |
| Pancreas donor 9                                                |                                             | 2250               |                                                             |                      |
| Pancreas donor 10                                               |                                             | 2322               |                                                             |                      |
| Pancreas donor 11                                               |                                             | 2141               |                                                             |                      |
| Pancreas donor 12                                               |                                             | 2786               |                                                             |                      |
| Immune cells in pancreatic carcinoma (PACA)                     |                                             |                    |                                                             |                      |
| CD8 T-cells in PACA                                             | GSE156728                                   | 5886               | GSE156278                                                   | 8                    |
| CD4 T-cells in PACA                                             |                                             | 3854               |                                                             |                      |
| Metastatic Merkel cell polyomavirus Merkel cell carcinoma (MCC) |                                             |                    |                                                             |                      |
| PBMC metastatic MCC                                             | GSE117988                                   | 11327              | PBMC from EBI Expres-<br>sion Atlas                         | 7                    |
| Liver cancer cell                                               |                                             |                    |                                                             |                      |
| Liver cancer set 1                                              | GSE125449                                   | 5058               | Liver cancer<br>from TCGA (GSE62944)                        | 377                  |
| Liver cancer set 2                                              |                                             | 4801               |                                                             |                      |
| Breast cancer cell                                              |                                             |                    |                                                             |                      |
| Breast cancer set                                               | GSE180286                                   | 3123               | Breast cancer from<br>TCGA (GSE62944)                       | 1122                 |

Table S2: **The variance of the REI and coverage.** The optimal REI and coverage, as well as the F score obtained with default and optimal REI and coverage were computed across 20 single-cell RNAseq datasets with different numbers of clusters and cell and tissue types to assess their variance. To evaluate the computational demands of the parameter optimization (PO), the size of the expanded and multi-cell population (MCP) models, the number of clusters and the running time with and without the PO is also given.

| Tissue/Cell type                            | Number of clusters | REI (in %) | Coverage (in %) | Optimal F score | Default F score | Expanded model number of reactions | MCP model number of reactions | Running time (with PO (hours)) | (without PO (hours)) |
|---------------------------------------------|--------------------|------------|-----------------|-----------------|-----------------|------------------------------------|-------------------------------|--------------------------------|----------------------|
| Colorectal cancer (CRC)                     |                    |            |                 |                 |                 |                                    |                               |                                |                      |
| CRC tumour all cells                        | 5                  | 20         | 2               | 0.167           | 0.217           | 48320                              | 22961                         | 6                              | 0.35                 |
| CRC normal mucosa All cells                 | 4                  | 20         | 5               | 0.109           | 0.130           | 39280                              | 17429                         | 5                              | 0.2                  |
| Human islet single-cells (HISC)             |                    |            |                 |                 |                 |                                    |                               |                                |                      |
| Pancreas donor 1                            | 10                 | 1          | 0.75            | 0.166           | 0.182           | 93520                              | 43078                         | 90                             | 4                    |
| Pancreas donor 2                            | 7                  | 1          | 0.25            | 0.169           | 0.172           | 66400                              | 30877                         | 15                             | 1.5                  |
| Pancreas donor 3                            | 11                 | 5          | 1.25            | 0.148           | 0.152           | 102560                             | 47787                         | 60                             | 4                    |
| Pancreas donor 4                            | 8                  | 5          | 0.25            | 0.160           | 0.161           | 75440                              | 36277                         | 24                             | 2                    |
| Pancreas donor 5                            | 6                  | 1          | 0.5             | 0.139           | 0.139           | 57360                              | 27545                         | 12                             | 1                    |
| Pancreas donor 6                            | 4                  | 1          | 0.25            | 0.142           | 0.142           | 39280                              | 17618                         | 3                              | 0.28                 |
| Pancreas donor 7                            | 8                  | 1          | 1               | 0.148           | 0.158           | 75440                              | 36202                         | 27                             | 3                    |
| Pancreas donor 8                            | 9                  | 1          | 0.25            | 0.174           | 0.179           | 84480                              | 40790                         | 84                             | 3                    |
| Pancreas donor 9                            | 11                 | 1          | 0.75            | 0.153           | 0.157           | 102560                             | 48930                         | 46                             | 5                    |
| Pancreas donor 10                           | 10                 | 1          | 0.5             | 0.165           | 0.165           | 93520                              | 44594                         | 37                             | 5                    |
| Pancreas donor 11                           | 10                 | 1          | 0.5             | 0.174           | 0.174           | 93520                              | 42657                         | 33                             | 4                    |
| Pancreas donor 12                           | 10                 | 1          | 0.25            | 0.182           | 0.183           | 93520                              | 43563                         | 37                             | 5.5                  |
| Immune cells in pancreatic carcinoma (PACA) |                    |            |                 |                 |                 |                                    |                               |                                |                      |
| CD8 T-cells in PACA                         | 16                 | 5          | 0.25            | 0.120           | 0.125           | 147760                             | 68378                         | 114                            | 22                   |
| CD4 T-cells in PACA                         | 10                 | 1          | 0.25            | 0.127           | 0.130           | 93520                              | 44108                         | 43                             | 8                    |
| PBMC metastatic MCC                         | 13                 | 1          | 0.25            | 0.187           | 0.208           | 120640                             | 49865                         | 77                             | 44                   |
| Liver cancer set 1                          | 17                 | 10         | 0.25            | 0.200           | 0.231           | 156800                             | 80161                         | 137                            | 20.5                 |
| Liver cancer set 2                          | 17                 | 1          | 0.5             | 0.207           | 0.207           | 156800                             | 75405                         | 125                            | 20.5                 |
| Breast cancer cell                          |                    |            |                 |                 |                 |                                    |                               |                                |                      |
| Breast cancer set                           | 7                  | 5          | 0.25            | 0.107           | 0.126           | 66400                              | 29482                         | 18                             | 5                    |
